# Supplementary material for: Improved Digit Span in Children after a 6-Week Intervention of Playing a Musical Instrument: An Exploratory Randomized Controlled Trial
Source: PubMed Central journal article supplement (PMC5766672; doi:10.3389/fpsyg.2017.02303), 2018-01-08

## *Supplementary Material*

# **Improved Digit Span in Children after a 6-Week Intervention of Playing a Musical Instrument: An Exploratory Randomized Controlled Trial**

**Xia Guo, Chie Ohsawa, Akiko Suzuki and Kaoru Sekiyama\***

\* **Correspondence:** Kaoru Sekiyama: [sekiyama.kaoru.8a@kyoto-u.ac.jp](mailto:sekiyama.kaoru.8a@kyoto-u.ac.jp)

### **1 Target songs: ‘*Antagata Dokosa*’ and ‘*Jingle Bells*’**

#### *Antagata Dokosa*

la la la do | re do re | mi do re | Phrase 1

mi mi re do la | la do do do re | Phrase 2

do re mi mi | re do la | re do la || Phrase 3

#### *Jingle Bells*

mi mi mi – | mi mi mi – | mi sol do re | mi – – – | Phrase 1

fa fa fa fa | fa mi mi mi | mi re re do | re – sol – | Phrase 2

mi mi mi – | mi mi mi – | mi sol do re | mi – – – | Phrase 3

fa fa fa fa | fa mi mi mi | sol sol fa re | do – – – || Phrase 4

2 Figure S1. F-value distribution of an analysis of variance with the permutation test

A Main effect of Group

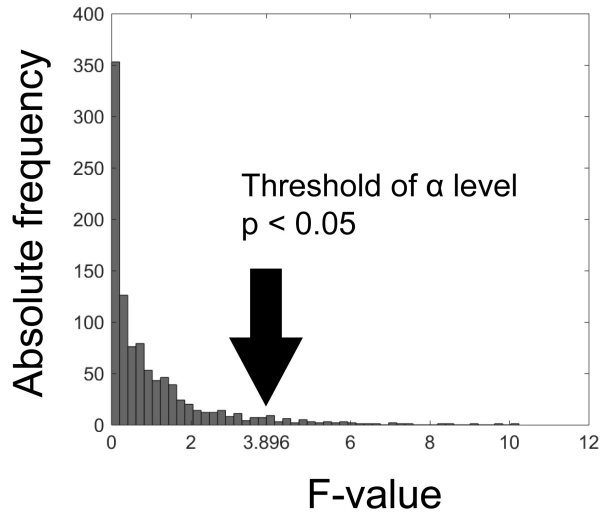

B Main effect of Time

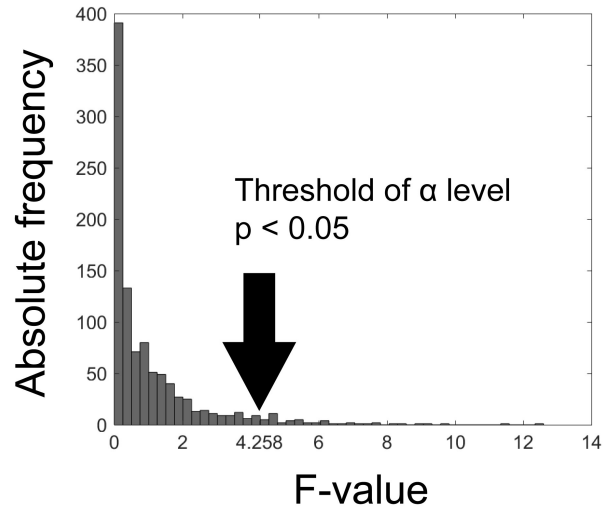

C Interaction effect between Group and Time

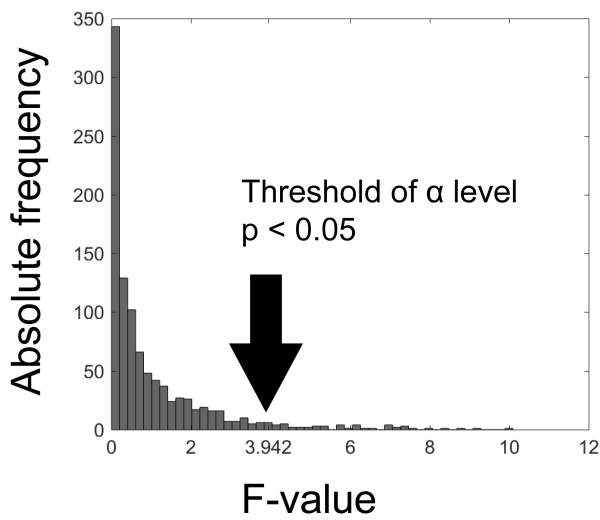

Supplement: Table1.pdf [file Table1.pdf]
